# Supplementary material for: Retinoids in Fungal Infections: From Bench to Bedside
Source: MDPI journal article supplement (doi:10.3390/ph14100962), 2021-09-24
Supplement: s1 [file s1]

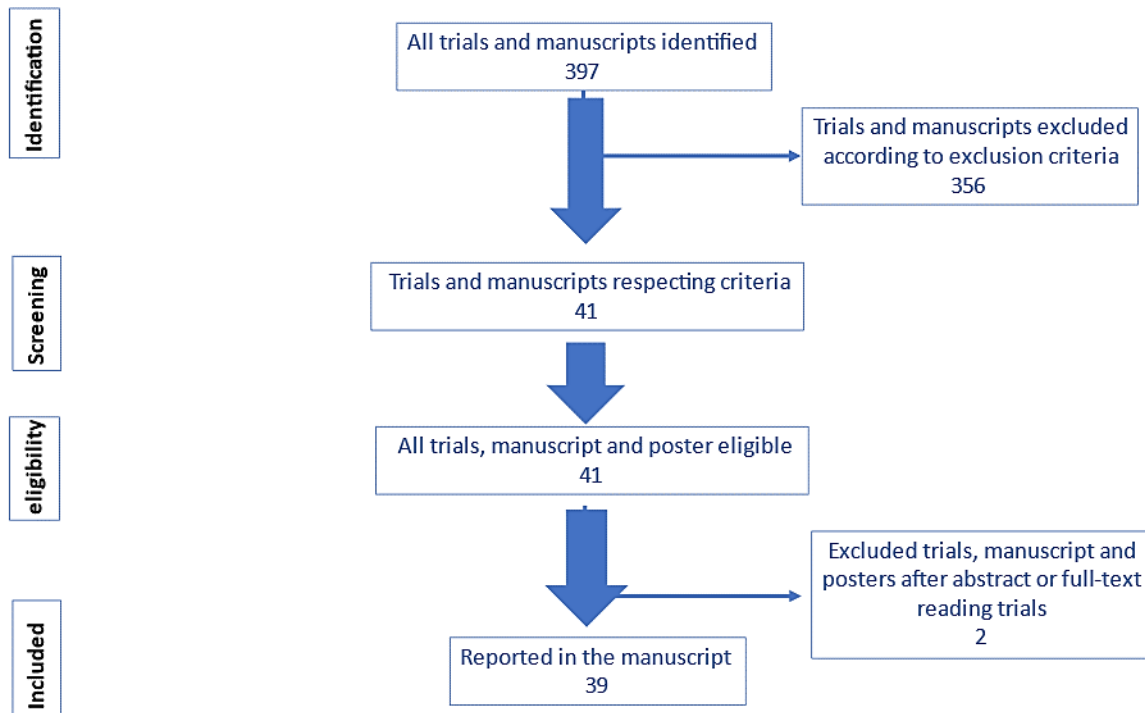

**Figure S1.** Flow chart reporting the research strategy. Three hundred and ninety-seven article or trials regarding retinoids and fungal infections were identified by this quantitative research. Three hundred and fifty-six were excluded after application of exclusion criteria. Among forty-one article or trials eligible for evaluation, two were excluded after abstract or full text reading. Thirty-nine articles or trials were evaluated in this review.

**Table S1.** Clinical trial reporting use of retinoid in fungal infection. Accessed on 8<sup>th</sup> August, 2021. Source: <https://clinicaltrials.gov/>.

| Official Title on ClinicalTrials.gov or publication title                                                                        | NCT Number, Status        | Phase | Sample size                                             | Drugs evaluated                                                            | Evaluation time | Primary Endpoint     | Results          |
|----------------------------------------------------------------------------------------------------------------------------------|---------------------------|-------|---------------------------------------------------------|----------------------------------------------------------------------------|-----------------|----------------------|------------------|
| Clinical, Laboratorial and Quality of Life Trial to Evaluate the Efficacy and Safety of Low-dose Oral Isotretinoin for Seborrhea | NCT01139749<br>recruiting | IV    | 50 participants<br>Randomized<br>Parallel<br>Assignment | oral isotretinoin capsules of 20 mg a day, every other day, for six months | 180 days        | sebum secretion rate | No result posted |
